# Supplementary material
Source: publisher figshare collection journal article supplement (https://karger.figshare.com/ndownloader/files/21974322)
Supplement: Supplementary file 1 [file 21974322]

Table S1 Patients demographics and past medical history by valve weight

|  | AVW low* (n=575) | | AVW high* (n=471) | |  |
| --- | --- | --- | --- | --- | --- |
|  | *N/Mean* | *%/STD* | *N/Mean* | *%/STD* | *p-value* |
| Age (years) | 75.6 | 9.0 | 73.8 | 11.0 | 0.003 |
| Males | 277 | 48.2 | 372 | 79 | <0.001 |
| Females | 298 | 51.8 | 99 | 21 |
| Height (cm) | 165.9 | 11.0 | 172.6 | 9.3 | <0.001 |
| Weight (kg) | 80.0 | 19.3 | 85.7 | 19.3 | <0.001 |
| BMI (kg/m2) | 29.7 | 19.7 | 28.7 | 5.5 | 0.23 |
| BSA (m2) | 1.9 | 0.2 | 2.0 | 0.2 | <0.001 |
| Diabetes | 182 | 33 | 129 | 28.5 | 0.13 |
| Hypertension | 455 | 82.4 | 365 | 80.4 | 0.41 |
| Hyperlipidemia | 364 | 65.9 | 286 | 63 | 0.33 |
| Chronic kidney disease | 93 | 16.9 | 63 | 13.9 | 0.2 |
| Coronary artery disease | 358 | 64.9 | 280 | 64.7 | 0.3 |
| Congestive heart failure | 174 | 31.5 | 114 | 25.1 | 0.025 |
| CABG | 164 | 28.5 | 108 | 22.9 | 0.04 |
| Mitral valve surgery | 52 | 9 | 26 | 5.5 | 0.031 |
| Stroke Vol/BSA (ml/m2) | 36.1 | 10.3 | 36.5 | 11.3 | 0.62 |
| Angiotensin receptor blockers | 89 | 20.7 | 45 | 12.9 | 0.004 |
| Diuretics | 155 | 36 | 120 | 34.5 | 0.67 |
| Beta-blockers | 314 | 73 | 261 | 75 | 0.5 |
| Antiplatelet | 324 | 75.2 | 259 | 74.4 | 0.81 |
| Statins | 303 | 70.3 | 235 | 67.5 | 0.4 |
| Bicuspid aortic valve | 32 | 5.6 | 70 | 14.9 | <0.001 |

* Dichotomized at ±2.64 g for males and ±2.13 g for females
